Role of the N- and C-terminal regions of FliF, the MS ring component in *Vibrio* flagellar  
basal body

Seiji Kojima\*<sup>#</sup>, Hiroki Kajino<sup>#</sup>, Keiichi Hirano, Yuna Inoue, Hiroyuki Terashima<sup>†</sup>,  
and Michio Homma\*

Affiliation: Division of Biological Science, Graduate School of Science, Nagoya University,  
Chikusa-ku, Nagoya 464-8602, Japan.

\*Corresponding author: Division of Biological Science, Graduate School of Science, Nagoya  
University, Chikusa-ku, Nagoya 464–8602, Japan Phone: +81-52-789-2991; Fax:  
+81-52-789-3054; E-mail address: g44416a@cc.nagoya-u.ac.jp (to M.H.) and  
z47616a@cc.nagoya-u.ac.jp (to S.K.)

<sup>†</sup>Present address: Institute of Tropical Medicine, Nagasaki University, Nagasaki, 852-8523,  
Japan.

<sup>#</sup>Both authors contributed equally to this work

Running title: Roles of the N- and C-terminal region of FliF

Keywords: bacterial flagellum, MS ring, supramolecular complex, FliF, FlhF

Author contributions: S.K. and M.H. designed research; H.K., K.H., Y.I., H.T. and S.K.  
performed experiments; H.K., S.K., and M.H. analyzed data; H.K., S.K. and M.H. wrote the  
paper.

## 1 **Abstract**

2

3 The MS ring is a part of the flagellar basal body and formed by 34 subunits of FliF, which  
4 consists of a large periplasmic region and two transmembrane segments connected to the N-  
5 and C-terminal regions facing the cytoplasm. A cytoplasmic protein, FlhF, which determines  
6 the position and number of the basal body, supports MS ring formation in the membrane. In  
7 this study, we constructed FliF deletion mutants that lack 30 or 50 residues at the N-terminus  
8 ( $\Delta N30$  and  $\Delta N50$ ), and 83 ( $\Delta C83$ ) or 110 residues ( $\Delta C110$ ) at the C-terminus. The N-terminal  
9 deletions were functional and conferred motility of *Vibrio* cells, whereas the C-terminal  
10 deletions were nonfunctional. The mutants were expressed in *Escherichia coli* to determine  
11 whether an MS ring could still be assembled. When co-expressing  $\Delta N30$ FliF or  $\Delta N50$ FliF  
12 with FlhF, fewer MS rings were observed than with the expression of wild-type FliF, in the  
13 MS ring fraction, suggesting that the N-terminus interacts with FlhF. MS ring formation is  
14 probably inefficient without an additional factor or FlhF. The deletion of the C-terminal  
15 cytoplasmic region did not affect the ability of FliF to form an MS ring because a similar  
16 number of MS rings were observed for  $\Delta C83$ FliF as with wild-type FliF, although further  
17 deletion of the second transmembrane segment ( $\Delta C110$ FliF) abolished it. These results  
18 suggest that the terminal regions of FliF have distinct roles; the N-terminal region for efficient  
19 MS ring formation and the C-terminal region for MS ring function. The second  
20 transmembrane segment is indispensable for MS ring assembly.

21

22

## 23 **Importance**

24 The bacterial flagellum is a supramolecular architecture involved in cell motility. At the base  
25 of the flagella, a rotary motor that begins to construct an MS ring in the cytoplasmic  
26 membrane comprises 34 transmembrane proteins (FliF). Here, we investigated the roles of the  
27 N and C terminal regions of FliF, which are MS rings. Unexpectedly, the cytoplasmic regions

28 of FliF are not indispensable for the formation of the MS ring, but the N-terminus appears to  
29 assist in ring formation through recruitment of FlhF, which is essential for flagellar formation.  
30 The C-terminus is essential for motor formation or function.

31

32

### 33 **Introduction**

34

35 Bacteria are prokaryotes, approximately 1  $\mu\text{m}$  in length. They travel in fluids using flagella  
36 that extend from the cell surface. The flagella are assembled as a supramolecular structure  
37 composed of more than 20 types of component proteins (1–3). A rotary motor at the base of  
38 each flagellum serves as a power engine. The motor uses the electrochemical potential  
39 difference of the coupling ions across the cell membrane to generate a rotational force. The  
40 cells can move by rotating helical flagellar filaments as screws. Bacteria use different  
41 coupling ions. *Escherichia coli* and *Salmonella enterica* have  $\text{H}^+$ -driven motors, or *Vibrio*  
42 *alginolyticus* and alkalophilic *Bacillus* have  $\text{Na}^+$ -driven motors (4, 5). The flagellar motor is  
43 composed of a stator and rotor, and a dozen stator units are assembled around each rotor (6).  
44 Structural changes in the stator, that couple with the flow of ions, generate torque by  
45 interacting with the rotor (5, 7). Bacteria containing  $\text{Na}^+$ -driven flagella, such as marine  
46 *Vibrio*, have two transmembrane proteins, PomA and PomB, as stator proteins, and form a  
47 heteromultimer complex (8, 9).

48 The rotor consists of an MS ring located on the cell membrane, and a C ring built on  
49 the cytoplasmic side of the MS ring. The MS ring is constructed by assembling dozen copies  
50 of FliF, a protein with two transmembrane segments (10–12). The subatomic structure of the  
51 MS ring was determined by cryo-electron microscopy, although the N-terminal and  
52 C-terminal regions were not found in *S. enterica* (13, 14). The C ring is composed of three  
53 proteins, FliG, FliM, and FliN, and forms a complex with the MS ring via FliG (15). FliG

54 plays an important role in the generation of rotational force, which is generated by the  
55 interaction between the stator protein MotA and the rotor protein FliG in *E. coli* (16, 17). The  
56 interaction to generate torque similarly occurs in the sodium-driven motor of *V. alginolyticus*  
57 (18–20).

58 Bacteria form flagella with various numbers and positions depending on the species.  
59 *E. coli* and *S. enterica* cells have peritrichous flagella with approximately 8–10 flagella per  
60 cell, which grow randomly on the cell surface. Contrarily, *Pseudomonas aeruginosa* and  
61 *Vibrio* species have a single flagellum at one pole with the cytoplasmic proteins FlhF and  
62 FlhG determining their position and number (21–24). FlhF, which has a GTPase activity and  
63 is similar to the signal recognition particle protein Ffh which has a role in protein export,  
64 controls the number of flagella positively localized at the cell pole, to determine the position  
65 of the flagellum. On the other hand, FlhG, which has ATPase activity and is similar to the cell  
66 division inhibitor MinD, which represses FlhF function to negatively control the number of  
67 flagella. In addition to these two proteins, as for *V. alginolyticus*, it has been shown that HubP  
68 and SflA is involved in the polar flagellar formation (24-26).

69 It is known that FlhG acts on FlhF to negatively control flagellar formation (22). The  
70 interaction between FlhF and FlhG has been shown by a pull-down assay, and the polar  
71 localization of FlhF increases in the absence of FlhG (27). Although it has not been shown in  
72 *V. alginolyticus*, FlhG (named FleN in *P. aeruginosa*) in *V. cholerae* (23) and in *P.*  
73 *aeruginosa* (28) interacts with the master transcription factor of flagellar genes, FlrA (*V.*  
74 *cholerae*) or FleQ (*P. aeruginosa*) to negatively regulate transcription.

75 The flagellum is constructed by sequentially assembling the flagellar structural  
76 proteins on the MS ring (29). The extracellular axial structures are called rods, hooks, and  
77 filaments in close proximity to the MS ring. The component proteins were supplied by the  
78 export apparatus, which is located inside the MS ring. It has been shown that FlhA, which is  
79 one of the main components of the export apparatus, interacts with FliF (30). We speculated

80 that the formations of the MS ring and export apparatus are dependent on each other. In *E.*  
81 *coli*, FlhA and FliG are required for MS ring formation to assemble FliF (31). Contrarily, it  
82 has been reported that *Salmonella* MS ring requires FliG but not FlhA to assemble FliF (32).  
83 Furthermore, it has been shown that *Salmonella* FliF can form MS rings by its overexpression  
84 alone (33, 34). In the case of *Vibrio* FliF, the overproduction of FliF in *E. coli* forms a small  
85 amount of MS ring, and co-expression of FliG or FlhF promotes MS ring formation (35).

86 In this study, we aimed to clarify how the cytoplasmic protein FlhF, which positively  
87 controls the number of flagella, acts on the MS ring component protein FliF to promote MS  
88 ring formation. We examined whether the cytoplasmic N-terminal or C-terminal region of  
89 FliF, which is likely to interact with FlhF, affects MS ring formation.

90

91

## 92 **Results**

### 93 **Motility of *fliF* mutants lacking the N-terminal and C-terminal regions.**

94 The *V. alginolyticus* FliF protein is composed of 580 amino acids with two transmembrane  
95 (TM) segments, and its N-terminal 54 residues and C-terminal 87 residues facing the  
96 cytoplasm (Fig. 1A). We constructed deletion mutants removing 30 or 50 N-terminal residues  
97 ( $\Delta$ N30 and  $\Delta$ N50 respectively), and 83 or 110 C-terminal residues ( $\Delta$ C83 and  $\Delta$ C110  
98 respectively). (Fig. 1B, Fig. S1). The resulting mutant proteins were expressed from the  
99 plasmid in *Vibrio fliF*-deficient strains (NMB196) and examined for cell motility on a soft  
100 agar plate (Fig. 1C). The N-terminal deletion mutants were able to form a swimming ring,  
101 although the  $\Delta$ N50 ring was smaller than that formed by the wild type. The amount of FliF  
102 protein was reduced in the  $\Delta$ N50 mutant, suggesting that the deletion mutant was unstable or  
103 expressed in lower amounts (Fig. S2). The flagellar formation and the swimming speed were  
104 similar among the mutants, when examined in a high-intensity dark-field microscope. The

105 C-terminal deletions abolished the motility of the cells on the soft agar plate (Fig. 1C). No  
106 flagella formation was observed in these mutants in a high-intensity dark-field microscope.  
107

#### 108 **MS ring formation of N-terminal deletions of FliF.**

109 We have previously reported that the MS ring is formed by *Vibrio* FliF with the co-expression  
110 of FlhF or FliG in *E. coli* cells (35). We cloned  $\Delta N30$  or  $\Delta N50$  mutant *fliF* into a pCold  
111 expression vector with a His-tag and a Factor Xa protease cleavage sequence at the  
112 N-terminus. We confirmed that the N-terminal His-tag did not affect FliF function in *Vibrio*  
113 cells (Fig. S3). Both mutants were also expressed similarly as the wild-type FliF in *E. coli*,  
114 and the membrane fraction was recovered and solubilized with the detergent dodecyl  
115 maltoside (DDM). The FliF protein was purified by Ni-affinity resin chromatography using  
116 the fused FliF tag. The affinity-purified fraction was precipitated by ultracentrifugation and  
117 used as the MS ring fraction (Fig. S4). MS rings were observed in the MS ring fraction with  
118 an electron microscope, for both  $\Delta N30$ FliF and  $\Delta N50$ FliF mutants, although in much less  
119 amounts than in the wild-type FliF (Fig. 2C and 2E). When FlhF was co-expressed with FliF,  
120 MS ring formation was facilitated in wild-type FliF, as reported previously (Fig. 2B) (35),  
121 whereas FlhF did not promote MS ring formation in  $\Delta N30$ FliF or  $\Delta N50$ FliF mutants (Fig. 2D  
122 and 2F). These results suggest that the MS ring formed by the deletion proteins is unstable,  
123 and it is difficult to form an MS ring with the assistance of FlhF in *E. coli* cells.

124

#### 125 **Observation of polar localization of N-terminally deleted FliF.**

126 It has been shown that polar FliF localization depends on FlhF, which is localized at the cell  
127 poles (35). N-terminal deletion mutants were fused with GFP to construct  $\Delta N30$ FliF-GFP or  
128  $\Delta N50$ FliF-GFP, and expressed by the arabinose-inducible plasmid in the *fliF* deletion strain.  
129 Fluorescent dots were observed at the cell poles in  $\Delta N30$ FliF-GFP or  $\Delta N50$ FliF-GFP,  
130 although the localization appeared to be reduced as compared to the wild-type FliF-GFP (Fig.

131 3A). In the *flhF* deletion strain, neither  $\Delta N30$ FliF-GFP nor  $\Delta N50$ FliF -GFP showed  
132 localization at the poles, as observed for the wild-type FliF-GFP, and fluorescence was  
133 observed throughout the cells (Fig. 3B). The *rpoN* mutant does not express polar flagellar  
134 genes, except for the master regulator, *flaK*. When  $\Delta N30$ FliF-GFP,  $\Delta N50$ FliF-GFP, or  
135 FliF-GFP were co-expressed with FlhF in the *rpoN* mutant, the fluorescence dots were  
136 observed at the cell poles (Fig. 3C), indicating that  $\Delta N30$ FliF and  $\Delta N50$ FliF can penetrate the  
137 cell pole independently. The above results supported the idea that the N-terminal cytoplasmic  
138 region of FliF preceding the transmembrane segment was not an interaction site for FlhF, but  
139 it has a role in promoting MS ring formation.

140

#### 141 **The ability of C-terminally deleted FliF to form an MS ring.**

142 The C-terminal deletion mutants were overexpressed in *E. coli* in the same manner as the  
143 N-terminal deletion mutants, and an MS ring fraction was obtained (Fig. S4). When the MS  
144 ring fraction was observed under an electron microscope, it was similar for  $\Delta C83$ FliF as well  
145 as the wild-type FliF (Fig. 4A), and FlhF promoted MS-ring formation (Fig. 4B). Contrarily,  
146 further deletion of the second TM segment abolished MS ring formation, as observed by  
147 electron microscopy (Fig. 4C).

148

149

#### 150 **Discussion**

151

152 Bacterial flagella are supramolecular structures composed of tens of thousands of molecules  
153 composed of 20 or more components. It is believed that flagella formation begins from the  
154 rotor MS ring and C ring assembly, and the export apparatus is constructed beneath the MS  
155 ring. After the basal structure has been constructed, the flagellar axial proteins are transported  
156 extracellularly by the export apparatus through the interior space of the tubular flagellar

157 structure. Flagellar proteins are assembled at the distal end of the filament to form a tubular  
158 structure. To construct a flagellar structure, it is essential to form an MS ring as a starting  
159 point. It has been shown that *Salmonella* FliF alone can form an MS ring if the protein is  
160 overproduced (33), whereas *Vibrio* FliF requires FliG or FlhF to make the MS ring efficiently  
161 (35).

162 When the *Vibrio* FliF protein was overexpressed in *E. coli*, more than half of the  
163 protein was recovered as a soluble protein in the cytoplasmic fraction (36). It was eluted as a  
164 broad peak in gel filtration chromatography, with an estimated molecular weight of  
165 approximately 700 kDa. The structure seemed to be a multimer composed of approximately  
166 10 FliF molecules. Since this structure could interact with FliG (36), it was presumed that the  
167 TM regions were woven inside the structure so that the C-terminal regions were exposed to  
168 the outside of the structure. This would be a consequence of many proteins not being inserted  
169 into the membrane. In *Vibrio* membrane proteins such as PomA and PomB, most proteins are  
170 inserted into the membrane by overexpression (37).

171 FliF of various species is a protein consisting of from 500 to 600 amino acids and  
172 contains two TMs at both ends. Both the N-terminus and C-terminus are present in the  
173 cytoplasmic region (Fig. 1A). The C-terminal region is known to interact with the N-terminal  
174 region of the FliG protein, which is a C-ring component protein (36). In the extracellular  
175 periplasmic region, three ring-building motifs (RBMs) have been inferred from homology  
176 with Type III injectisomes (38). These are RBM1, RBM2, and RBM3 beginning from the  
177 N-terminus. Recently, structural analysis of the MS ring of *Salmonella* was performed at  
178 atomic resolution by single particle analysis using cryo-electron microscopy (13, 14). RBM1,  
179 RBM2, and RBM3 contribute to the M ring and S ring formation, respectively. The MS ring  
180 formed a ring structure through the interaction of 34 FliF molecules in the extracellular  
181 domain. Although the MS ring structure of *V. alginolyticus* has not been solved, it is  
182 presumed that it has a similar structure based on its homology and ring size (35).



183           The cytoplasmic N-terminus of FliF is relatively highly conserved among *Vibrio*  
184 species and is approximately 30 amino acids longer than that of the *Salmonella* or *E. coli* FliF.  
185 We speculated that this long N-terminal region would prevent MS ring formation in *E. coli*. In  
186 addition, since the N-terminal cytoplasmic region of *Vibrio* species has a similar length and  
187 homology, it has been speculated that this N-terminal region has a specific function in *Vibrio*  
188 FliF. The C-terminal deletion mutants,  $\Delta C83$ FliF and  $\Delta C110$ , which lacked 83 and 110  
189 C-terminal residues, completely lost their function, whereas the N-terminal deletion mutants,  
190  $\Delta N30$ FliF or  $\Delta N50$ FliF, which lacked 30 and 50 N-terminal residues, were unexpectedly  
191 functional in *Vibrio*. The polar localization of the N-terminal deletion mutants was  
192 investigated using FliF-GFP. FliF-GFP dots were observed at the poles, although the polar  
193 localization was slightly lower than that of the wild type. These polar localizations  
194 disappeared as observed in the FlhF-deficient background, suggesting that  $\Delta N30$ FliF and  
195  $\Delta N50$ FliF require FlhF to localize at the cell pole. However, FlhF does not promote MS ring  
196 formation by using  $\Delta N30$ FliF or  $\Delta N50$ FliF in *E. coli* cells. It seems that FlhF can recruit these  
197 N-terminally deleted FliF to the pole, but these constructs are unstable to form the MS ring  
198 efficiently. Contrarily, we showed that MS rings were formed in the C-terminal deletion  
199  $\Delta C83$ FliF, and FlhF promoted ring formation using this construct in a manner similar to that  
200 of wild-type FliF. The cytoplasmic regions were not essential for the formation of the MS ring.  
201 We speculate that the N-terminal cytoplasmic region of FliF is involved in the stability of the  
202 MS ring or in FlhF assistance for MS ring formation. Contrarily, the C-terminal cytoplasmic  
203 region is not involved in MS ring formation and does not interact with FlhF. Although the  
204 formation of the MS ring seems to be normal in the C-terminal cytoplasmic deletion mutant,  
205 motility is compromised and the flagellum is not generated. This is because the C-terminal  
206 region of FliF interacts with the N-terminal region of FliG to form a C ring. In the C-terminal  
207 deletion mutant  $\Delta C110$ FliF, we could not observe any MS ring, suggesting that at least the  
208 second TM region is essential for the formation of the MS ring. As a result, we concluded that

209 the N-terminal region is involved in MS ring formation, although it is not essential, and this  
210 region does not interfere with ring formation in *E. coli*. It is not known whether FlhF interacts  
211 directly or indirectly with FliF. However, FlhF likely interacts with the N-terminal sequence  
212 of FliF. The ring-forming ability and polar localization ability of FliF may not be coordinated  
213 with each other. It has been speculated that the assembly of the MS ring requires a core  
214 structure, which is a part of the rod composed of FliQ, FliP, and FliQ, is fitted inside the MS  
215 ring and consists of a Type III export apparatus (39, 40). FliQ, FliP, and FliQ are 4-fold (25  
216 kDa), 2-fold (9 kDa), and 6-fold (26 kDa) transmembrane proteins respectively, which form a  
217 5:4:1 stoichiometric structure. Presumably, the FliOPQ core is required for FliF assembly to  
218 form an MS ring under normal conditions, which does not overproduce the FliF protein.

219 To form the MS ring, FliF must first be inserted into the membrane. A general  
220 membrane transport mechanism is thought to be used for the membrane insertion of the FliF  
221 protein (41, 42). First, *fliF* mRNA is recognized by the ribosome, followed by translation.  
222 When the TM1 region of FliF is translated, this hydrophobic region is recognized by the SRP  
223 protein (Ffh) and interacts with the FtsY membrane-bound to the transport device to target it.  
224 FtsY and Ffh are GTPases with a three-domain structure. These proteins are homologous with  
225 the GTPase FlhF (27, 35). We propose a scheme to form an MS ring from FliF monomers.  
226 Considering the function of FlhF in relation to SRP, FlhF may interact with SRP to facilitate  
227 its targeting to the Sec translocon (Fig. 5). In *Vibrio*, SflA prevents flagellar formation in the  
228 absence of FlhF because we have shown that the *flhF* and *flhG* double deletion strain, whose  
229 cells almost lose flagella, recover the flagellar formation at the peritrichous position by the  
230 additional mutation of *sflA*. In the next step, we want to show evidence that SRP interacts  
231 with flagellar proteins, such as SflA and FlhF.

232

233

234 **Materials and methods**

235

236           **Bacterial strains and plasmids.** The bacterial strains and plasmids used in this study  
237 are listed in Table S1. *Vibrio* was cultured in VC broth (0.5% [w/v] hipolypeptone, 0.5% (w/v)  
238 yeast extract, 3% (w/v) NaCl, 0.4% (w/v) K<sub>2</sub>HPO<sub>4</sub>, 0.2% (w/v) glucose] or VPG broth [1%  
239 (w/v) hipolypeptone, 3% (w/v) NaCl, 0.4% (w/v) K<sub>2</sub>HPO<sub>4</sub>, 0.5% (w/v) glycerol], and *E. coli*  
240 was cultured in LB broth [1% (w/v) bactotryptone, 0.5% (w/v) yeast extract, 0.5% (w/v)  
241 NaCl] or SB broth [1.2%(w/v) bactotryptone, 2.4%(w/v) yeast extract, 1.25% (w/v) K<sub>2</sub>HPO<sub>4</sub>,  
242 0.38% (w/v) KH<sub>2</sub>PO<sub>4</sub>, 0.5% (v/v) glycerol]. Chloramphenicol was added to a final  
243 concentration of 2.5 µg/mL for *Vibrio* and 25 µg/mL for *E. coli*. Ampicillin was added at a  
244 final concentration of 100 µg/mL for *E. coli*. Kanamycin was added at a final concentration of  
245 100 µg/mL for *Vibrio* spp.

246           **Construction of the deletion mutants.** To generate N-terminal FliF deletion  
247 constructs, a one-step PCR-based method was employed as previously described (43). To  
248 generate C-terminal FliF deletion constructs, a stop codon was introduced at the desired  
249 position of *fliF* by the QuikChange site-directed mutagenesis method as described by  
250 Stratagene (36). Each mutation was confirmed by DNA sequencing.

251           **Transformation of *V. alginolyticus*.** Introduction of the plasmid into *V.*  
252 *alginolyticus* was performed according to an electroporation method using Gene Pulser (Bio  
253 Rad) as previously described (44).

254           **MS ring purification.** *E. coli* BL21(DE3) cells harboring pRO101 or its derivatives  
255 (for expression of FliF or its deletions), and pTSK122 (for expression of FlhF) were  
256 inoculated from a frozen stock onto a plate containing appropriate antibiotics, and the  
257 colonies were inoculated into 30 mL of LB broth and cultured with shaking at 37 °C  
258 overnight. 20 mL of the overnight culture was added to 2 L of LB broth and cultured at 37 °C  
259 with shaking until OD<sub>600</sub> = ca. 0.5. The cells were then subjected to cold shock by placing  
260 them in ice-cold water for 40 min. After IPTG was added to a final concentration of 0.5 mM,

261 and cultured with shaking at 16 °C overnight. The cells were collected ( $4,600 \times g$ , 10 min)  
262 and suspended in TEN buffer (10 mM Tris-HCl [pH 8.0], 5 mM EDTA-NaOH [pH 8.0], 50  
263 mM NaCl) containing proteinase inhibitor (cOmplete, Sigma-Aldrich Co.). The cell  
264 suspension was transferred to a 50 mL Falcon tube and stored at  $-80$  °C.

265 The bacterial suspension was thawed in water, and the cells were disrupted using a  
266 French press (9,000–10,000 psi, OTAKE Works). Undisrupted cells were removed by  
267 centrifugation ( $20,000 \times g$ , 20 min), and the supernatant was ultracentrifuged at  $90,000 \times g$   
268 for 1 h. The precipitate was suspended in 45 mL of suspension buffer (10 mM Tris-HCl [pH  
269 8.0], 50 mM NaCl), and 5 mL of 10% dodecyl maltoside (DDM) was added. After stirring at  
270 4 °C for 1 h, the suspension was centrifuged at  $20,000 \times g$  for 20 min, and the supernatant was  
271 ultracentrifuged at  $90,000 \times g$  for 1 h. The precipitate was suspended in 10 mL of  
272 re-suspension buffer (10 mM Tris-HCl [pH 8.0], 5 mM EDTA-NaOH [pH 8.0], and 50 mM  
273 NaCl, 0.05% [w/v] DDM) to obtain a crude MS ring fraction. This fraction was shaken in a  
274 cold room overnight and centrifuged at  $20,000 \times g$  for 5 min. The supernatant was used for  
275 Ni-affinity purification using a His-tag.

276 **Ni affinity purification of the MS ring using His-tag.** A 10 mL empty column  
277 (Qiagen) was packed with 1 mL of Ni-NTA superflow (Qiagen). After washing with 10 mL  
278 of MilliQ water, the column was equilibrated with 10 mL of wash buffer (10 mM Tris-HCl  
279 [pH 8.0], 5 mM EDTA-NaOH [pH 8.0], 50 mM NaCl, 0.05% [w/v] DDM, 50 mM imidazole).  
280 The crude MS ring fraction was added to the column, and the flow-through fraction collected  
281 to increase the recovery of the MS ring was added to the column again. The column was  
282 washed with 5 mL of wash buffer and again with 20 mL of wash buffer. Thereafter, the  
283 protein was eluted with 5 mL of elution buffer (10 mM Tris-HCl [pH 8.0], 5 mM  
284 EDTA-NaOH [pH 8.0], 50 mM NaCl, 0.05% [w/v] DDM, and 300 mM imidazole) to obtain  
285 the MS ring fraction. The fraction was ultracentrifuged at  $90,000 \times g$  for 1 h. The precipitate  
286 was resuspended in 100  $\mu$ L of the remaining elution buffer.

287           **Observation by electron microscopy.** The purified MS ring was observed by  
288 negative staining using an electron microscope. After hydrophilizing the carbon-coated  
289 copper grids, 2.5  $\mu$ L of the sample solution was placed on the grid and stained with 2% (w/v)  
290 uranyl acetate. The grid was observed using a transmission electron microscope (JEM-1010,  
291 JEOL) at 100 kV.

292           **Fluorescence microscopy observations.** *Vibrio* cells were cultured overnight in VC  
293 medium at 30 °C. The overnight culture was diluted 1:100 in fresh VPG medium containing  
294 0.02% (w/v) arabinose and 100  $\mu$ g mL<sup>-1</sup> kanamycin, and was cultured at 30 °C for 4 h.  
295 Fluorescence microscopy was performed as previously described (27). Briefly, cultured cells  
296 were harvested and resuspended in V buffer (50 mM Tris-HCl [pH 7.5], 300 mM NaCl, and 5  
297 mM MgCl<sub>2</sub>). These cells were fixed on slides via poly-L-lysine, washed with V buffer, and  
298 observed under a BX-50 microscope (Olympus). Fluorescent images were recorded and  
299 processed using a digital camera (Hamamatsu photonics ORCA-Flash4.0) and HSR imaging  
300 software (Hamamatsu Photonics).

301

302

### 303 **Acknowledgements**

304 We thank Dr. Kimika Maki for technical support with electron microscopy. This work was  
305 supported in part by JSPS KAKENHI Grant Numbers 16H04774 (to S.K.), or 20H03220 (to  
306 M.H.).

307

308

### 309 **Supporting information**

310 Supplementary information associated with this article can be found in the online version of  
311 the publisher's website.

312

313

314 **References**

- 315 1. Berg HC. 2003. The rotary motor of bacterial flagella. *Annu Rev Biochem* 72:19-54.
- 316 2. Macnab RM. 2003. How bacteria assemble flagella. *Annu Rev Microbiol* 57:77-100.
- 317 3. Armitage JP, Berry RM. 2020. Assembly and dynamics of the bacterial flagellum.  
318 *Annu Rev Microbiol* doi:10.1146/annurev-micro-090816-093411.
- 319 4. Blair DF. 2003. Flagellar movement driven by proton translocation. *FEBS Lett*  
320 545:86-95.
- 321 5. Terashima H, Kojima S, Homma M. 2008. Flagellar motility in bacteria structure and  
322 function of flagellar motor. *Int Rev Cell Mol Biol* 270:39-85.
- 323 6. Leake MC, Chandler JH, Wadhams GH, Bai F, Berry RM, Armitage JP. 2006.  
324 Stoichiometry and turnover in single, functioning membrane protein complexes.  
325 *Nature* 443:355-8.
- 326 7. Kojima S, Blair DF. 2004. The bacterial flagellar motor: structure and function of a  
327 complex molecular machine. *Int Rev Cytol* 233:93-134.
- 328 8. Sato K, Homma M. 2000. Multimeric structure of PomA, the Na<sup>+</sup>-driven polar  
329 flagellar motor component of *Vibrio alginolyticus*. *J Biol Chem* 275:20223-20228.
- 330 9. Sato K, Homma M. 2000. Functional reconstitution of the Na<sup>+</sup>-driven polar flagellar  
331 motor component of *Vibrio alginolyticus*. *J Biol Chem* 275:5718-22.
- 332 10. Jones CJ, Macnab RM, Okino H, Aizawa S. 1990. Stoichiometric analysis of the  
333 flagellar hook-(basal-body) complex of *Salmonella typhimurium*. *J Mol Biol*  
334 212:377-387.
- 335 11. Suzuki H, Yonekura K, Murata K, Hirai T, Oosawa K, Namba K. 1998. A structural  
336 feature in the central channel of the bacterial flagellar FliF ring complex is implicated  
337 in type III protein export. *J Struct Biol* 124:104-114.
- 338 12. Suzuki H, Yonekura K, Namba K. 2004. Structure of the rotor of the bacterial flagellar

- 339 motor revealed by electron cryomicroscopy and single-particle image analysis. *J Mol*  
340 *Biol* 337:105-13.
- 341 13. Johnson S, Fong YH, Deme JC, Furlong EJ, Kuhlen L, Lea SM. 2020. Symmetry  
342 mismatch in the MS-ring of the bacterial flagellar rotor explains the structural  
343 coordination of secretion and rotation. *Nat Microbiol* 5:966-975.
- 344 14. Kawamoto A, Miyata T, Makino F, Kinoshita M, Minamino T, Imada K, Kato T,  
345 Namba K. 2021. Native structure of flagellar MS ring is formed by 34 subunits with  
346 23-fold and 11-fold subsymmetries. *BioRxiv*  
347 doi:<https://doi.org/10.1101/2020.10.11.334888>.
- 348 15. Francis NR, Sosinsky GE, Thomas D, Derosier DJ. 1994. Isolation, characterization  
349 and structure of bacterial flagellar motors containing the switch complex. *J Mol Biol*  
350 235:1261-1270.
- 351 16. Lloyd SA, Whitby FG, Blair DF, Hill CP. 1999. Structure of the C-terminal domain of  
352 FliG, a component of the rotor in the bacterial flagellar motor. *Nature* 400:472-475.
- 353 17. Zhou JD, Lloyd SA, Blair DF. 1998. Electrostatic interactions between rotor and stator  
354 in the bacterial flagellar motor. *Proc Natl Acad Sci USA* 95:6436-6441.
- 355 18. Yakushi T, Yang J, Fukuoka H, Homma M, Blair DF. 2006. Roles of charged residues  
356 of rotor and stator in flagellar rotation: comparative study using H<sup>+</sup>-driven and  
357 Na<sup>+</sup>-driven motors in *Escherichia coli*. *J Bacteriol* 188:1466-72.
- 358 19. Takekawa N, Kojima S, Homma M. 2014. Contribution of many charged residues at  
359 the stator-rotor interface of the Na<sup>+</sup>-driven flagellar motor to torque generation in  
360 *Vibrio alginolyticus*. *J Bacteriol* 196:1377-85.
- 361 20. Onoue Y, Kojima S, Homma M. 2015. Effect of FliG three amino acids deletion in  
362 *Vibrio* polar-flagellar rotation and formation. *J Biochem* doi:10.1093/jb/mvv068.
- 363 21. Pandza S, Baetens M, Park CH, Au T, Keyhan M, Matin A. 2000. The G-protein FlhF  
364 has a role in polar flagellar placement and general stress response induction in



- 365 *Pseudomonas putida*. Mol Microbiol 36:414-423.
- 366 22. Kusumoto A, Kamisaka K, Yakushi T, Terashima H, Shinohara A, Homma M. 2006.
- 367 Regulation of polar flagellar number by the *flhF* and *flhG* genes in *Vibrio*
- 368 *alginolyticus*. J Biochem (Tokyo) 139:113-121.
- 369 23. Correa NE, Peng F, Klose KE. 2005. Roles of the regulatory proteins FlhF and FlhG
- 370 in the *Vibrio cholerae* flagellar transcription hierarchy. J Bacteriol 187:6324-6332.
- 371 24. Kojima S, Terashima H, Homma M. 2020. Regulation of the Single Polar Flagellar
- 372 Biogenesis. Biomolecules 10:533.
- 373 25. Takekawa N, Kwon S, Nishioka N, Kojima S, Homma M. 2016. HubP, a polar
- 374 landmark protein, regulates flagellar number by assisting in the proper polar
- 375 localization of FlhG in *Vibrio alginolyticus*. J Bacteriol 198:3091-3098.
- 376 26. Kitaoka M, Nishigaki T, Ihara K, Nishioka N, Kojima S, Homma M. 2013. A novel
- 377 dnaJ family gene, *sflA*, encodes an inhibitor of flagellation in marine *Vibrio* species. J
- 378 Bacteriol 195:816-822.
- 379 27. Kusumoto A, Shinohara A, Terashima H, Kojima S, Yakushi T, Homma M. 2008.
- 380 Collaboration of FlhF and FlhG to regulate polar-flagella number and localization in
- 381 *Vibrio alginolyticus*. Microbiology 154:1390-1399.
- 382 28. Baraquet C, Harwood CS. 2013. Cyclic diguanosine monophosphate represses
- 383 bacterial flagella synthesis by interacting with the Walker A motif of the
- 384 enhancer-binding protein FleQ. Proc Natl Acad Sci U S A 110:18478-18483.
- 385 29. Kubori T, Yamaguchi S, Aizawa S. 1997. Assembly of the switch complex onto the
- 386 MS ring complex of *Salmonella typhimurium* does not require any other flagellar
- 387 proteins. J Bacteriol 179:813-817.
- 388 30. Kihara M, Minamino T, Yamaguchi S, Macnab RM. 2001. Intergenic suppression
- 389 between the flagellar MS ring protein FliF of *Salmonella* and FlhA, a membrane
- 390 component of its export apparatus. J Bacteriol 183:1655-1662.



- 391 31. Li H, Sourjik V. 2011. Assembly and stability of flagellar motor in *Escherichia coli*.  
392 Mol Microbiol 80:886-99.
- 393 32. Morimoto YV, Ito M, Hiraoka KD, Che YS, Bai F, Kami-Ike N, Namba K, Minamino  
394 T. 2014. Assembly and stoichiometry of FliF and FlhA in *Salmonella* flagellar basal  
395 body. Mol Microbiol 91:1214-1226.
- 396 33. Ueno T, Oosawa K, Aizawa SI. 1992. M-ring, S-ring and proximal rod of the flagellar  
397 basal body of *Salmonella-typhimurium* are composed of subunits of a single protein,  
398 FliF. J Mol Biol 227:672-677.
- 399 34. Ueno T, Oosawa K, Aizawa S. 1994. Domain Structures of the MS Ring Component  
400 Protein (FliF) of the Flagellar Basal Body of *Salmonella typhimurium*. J Mol Biol  
401 236:546-555.
- 402 35. Terashima H, Hirano K, Inoue Y, Tokano T, Kawamoto A, Kato T, Yamaguchi E,  
403 Namba K, Uchihashi T, Kojima S, Homma M. 2020. Assembly mechanism of a  
404 supramolecular MS-ring complex to initiate bacterial flagellar biogenesis in *Vibrio*  
405 species. J Bacteriol 202:e00236-20.
- 406 36. Ogawa R, Abe-Yoshizumi R, Kishi T, Homma M, Kojima S. 2015. Interaction of the  
407 C-terminal tail of FliF with FliG from the Na<sup>+</sup>-driven flagellar motor of *Vibrio*  
408 *alginolyticus*. J Bacteriol 197:63-72.
- 409 37. Onoue Y, Iwaki M, Shinobu A, Nishihara Y, Iwatsuki H, Terashima H, Kitao A,  
410 Kandori H, Homma M. 2019. Essential ion binding residues for Na<sup>+</sup> flow in stator  
411 complex of the *Vibrio* flagellar motor. Sci Rep 9:11216.
- 412 38. Bergeron JR. 2016. Structural modeling of the flagellum MS ring protein FliF reveals  
413 similarities to the type III secretion system and sporulation complex. PeerJ 4:e1718.
- 414 39. Kuhlen L, Abrusci P, Johnson S, Gault J, Deme J, Caesar J, Dietsche T, Mebrhatu MT,  
415 Ganief T, Macek B, Wagner S, Robinson CV, Lea SM. 2018. Structure of the core of  
416 the type III secretion system export apparatus. Nat Struct Mol Biol 25:583-590.

- 417 40. Johnson S, Kuhlen L, Deme JC, Abrusci P, Lea SM. 2019. The structure of an  
418 injectisome export gate demonstrates conservation of architecture in the core export  
419 gate between flagellar and virulence Type III secretion systems. *mBio* 10.
- 420 41. Rapoport TA, Li L, Park E. 2017. Structural and mechanistic insights into protein  
421 translocation. *Annu Rev Cell Dev Biol* 33:369-390.
- 422 42. Steinberg R, Knupffer L, Origi A, Asti R, Koch HG. 2018. Co-translational protein  
423 targeting in bacteria. *FEMS Microbiol Lett* 365.
- 424 43. Li N, Kojima S, Homma M. 2011. Characterization of the periplasmic region of PomB,  
425 a Na<sup>+</sup>-driven flagellar stator protein in *Vibrio alginolyticus*. *J Bacteriol*  
426 193:3773-3784.
- 427 44. Kawagishi I, Okunishi I, Homma M, Imae Y. 1994. Removal of the periplasmic  
428 DNase before electroporation enhances efficiency of transformation in a marine  
429 bacterium *Vibrio alginolyticus*. *Microbiology* 140:2355-2361.
- 430
- 431
- 432

433 **Figure legends**

434

435 **Fig. 1.** (A) Membrane topology of *Vibrio* FliF. (B) Schematic diagram of N-terminal and  
436 C-terminal deleted *Vibrio* FliF. (C) Motility of N-terminal deletion FliF in soft agar plate. The  
437 *fliF* deletion mutant (NMB196) producing wild-type FliF,  $\Delta N30$ FliF, and  $\Delta N50$ FliF from the  
438 pBAD plasmids (Vec) were inoculated on soft agar plate at 30 °C for 5 hours. Motility of  
439 C-terminal deletion FliF in soft agar plate. The *fliF* deletion mutant (NMB196) producing  
440 wild-type FliF,  $\Delta C83$ FliF, and  $\Delta C110$ FliF were inoculated on soft agar plate at 30 °C for 4 h.

441

442 **Fig. 2.** Electron microscopic observation of MS ring made by N-terminal deleted FliF. *E. coli*  
443 BL21 (DE3) cells harboring pRO101 (A), pRO101 and pTSK22 (B), pRO101- $\Delta N30$  (C),  
444 pRO101- $\Delta N30$  and pTSK122 (D), pRO101- $\Delta N50$  (E), or pRO101- $\Delta N50$  and pTSK122 (F)  
445 were cultured and the MS ring was isolated. The membrane fraction was solubilized with  
446 dodecyl maltoside (DDM) and the MS ring was precipitated by ultracentrifugation (Fig. S4).  
447 The MS ring fraction was observed with an electron microscope. The scale bars; 50 nm.

448

449 **Fig. 3.** Observation of localization of N-terminal deleted FliF in *Vibrio*. The cells of  $\Delta fliF$   
450 strain (A),  $\Delta flhF$  strain (B), or *flhF* co-expressed *rpoN* strain (C), harboring  
451 pYI101(FliF-GFP), pYI101- $\Delta N30$  ( $\Delta N30$ FliF-GFP), pYI101- $\Delta N50$  ( $\Delta N50$ FliF-GFP) were  
452 cultured in VPG broth containing 0.02% (w/v) arabinose for 4 h at 30 °C and were observed  
453 by fluorescent microscopy.

454

455 **Fig. 4.** Electron microscopic observation of MS ring made by C-terminal deleted FliF. *E. coli*  
456 BL21 (DE3) cells harboring pRO101- $\Delta C83$  (A), pRO101- $\Delta C83$  and pTSK22 (B),  
457 pRO101- $\Delta C110$  (C) were cultured and purified same as Fig. 2. The MS ring fraction was  
458 observed with an electron microscope. The scale bars; 50 nm.

459

460 **Fig. 5.** A model of MS ring formation made by FliF proteins. SflA may interact with SRP to

461 prevent FliF to interact with SPR recognition particle. FlhF dominates the SflA protection.

462 FlhF may assist FliF to insert the Sec translocon machinery.

(A)

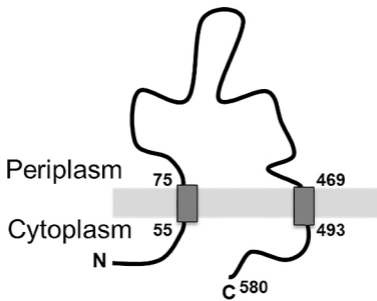

(B)

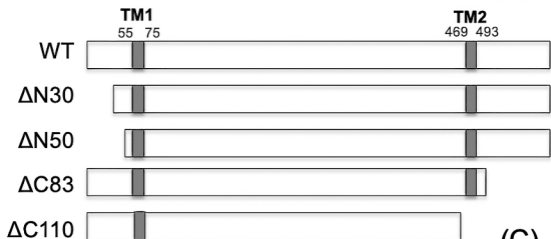

(C)

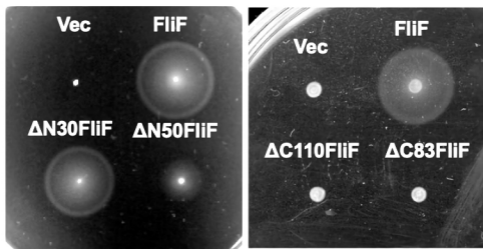

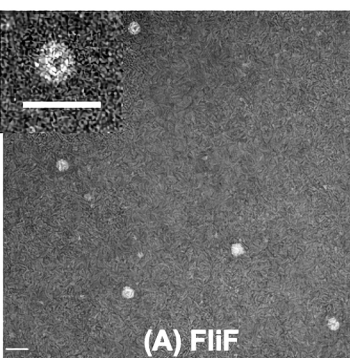

**(A) FliF**

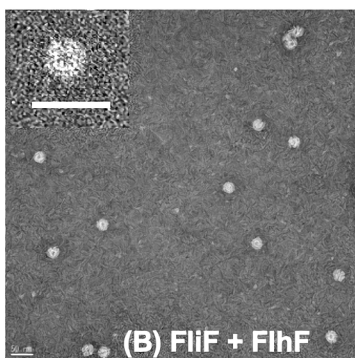

**(B) FliF + FliH**

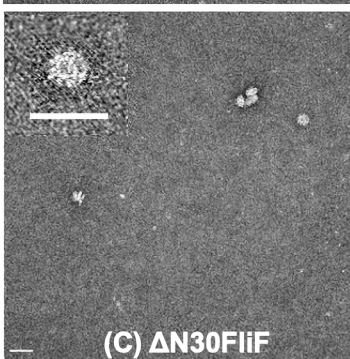

**(C)  $\Delta$ N30FliF**

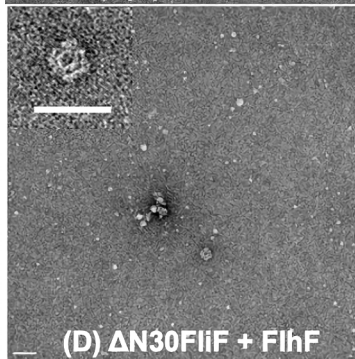

**(D)  $\Delta$ N30FliF + FliH**

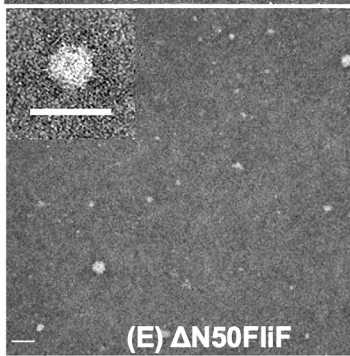

**(E)  $\Delta$ N50FliF**

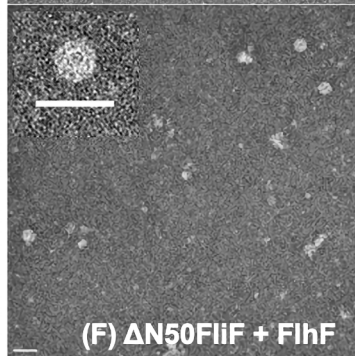

**(F)  $\Delta$ N50FliF + FliH**

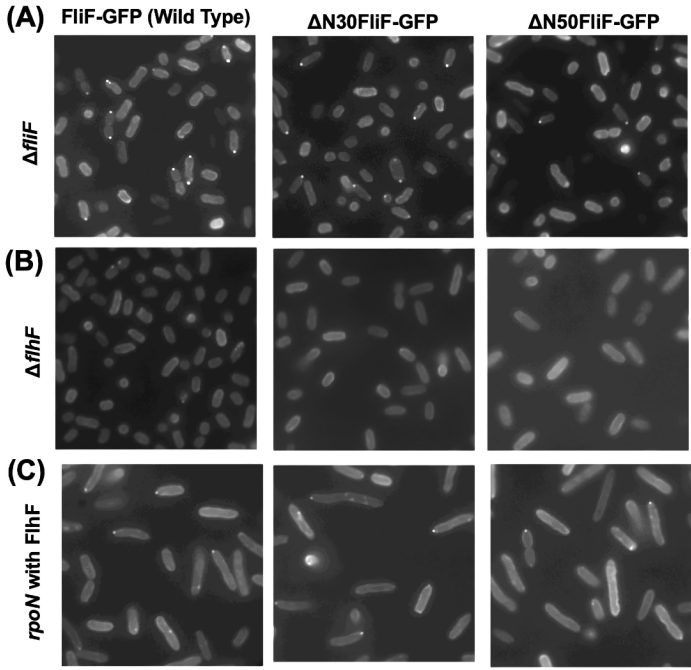

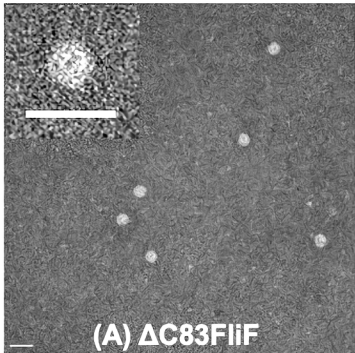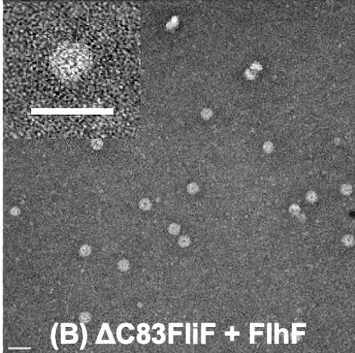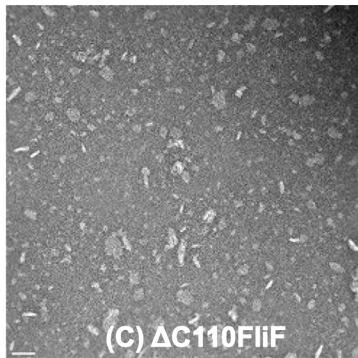



Translocon

FliF assembly/MS-ring formation

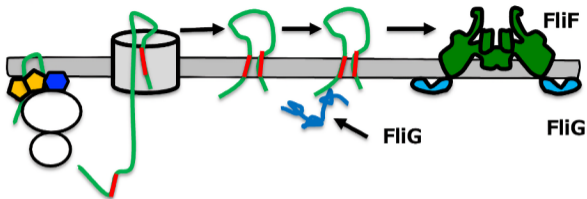

HubP

SfIA

SRP

TM

FliF

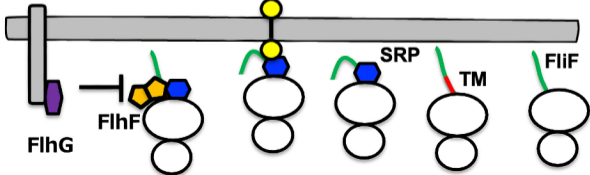

Source: https://www.biorxiv.org/content/10.1101/2021.01.04.425360v1.full.pdf
